# Supplementary material for: Facile fabrication of hollow CuO nanocubes for enhanced lithium/sodium storage performance
Source: Royal Society of Chemistry journal article supplement (doi:10.1039/d1ce00704a), 2021-01-01
Supplement: d1ce00704a1.pdf [file d1ce00704a1.pdf]

## Supporting Information

### Facile Fabrication of Hollow CuO Nanocubes for Enhanced Lithium/Sodium

#### Storage Performance

Jie Zhao,<sup>a,b</sup> Yuyan Zhao,<sup>c</sup> Wen-Ce Yue,<sup>a,d</sup> Shu-Min Zheng,<sup>a</sup> Xue Li,<sup>a</sup> Ning Gao,<sup>a,b</sup> Ting Zhu,<sup>\*e</sup> Yu-Jiao Zhang,<sup>\*a</sup> Guang-Ming Xia,<sup>d</sup> and Bao Wang,<sup>\*a,b</sup>

- a. State Key Laboratory of Biochemical Engineering, Institute of Process Engineering, Chinese Academy of Sciences, Beijing 100190, China.
  - b. Nanjing IPE Institute of Green Manufacturing Industry, Nanjing 211135, China.
  - c. Key Laboratory of Bio-inspired Materials and Interfacial Science, Technical Institute of Physics and Chemistry, Chinese Academy of Sciences, Beijing, 100190, China.
  - d. School of Chemistry and Chemical Engineering, University of Jinan, Jinan 250022, China.
  - e. School of Materials Science & Engineering, Central South University, Changsha, Hunan 410083, China
- \* Corresponding author: E-mails: baowang@ipe.ac.cn; ZYJ\_20170112@163.com; zhut0002@csu.edu.cn

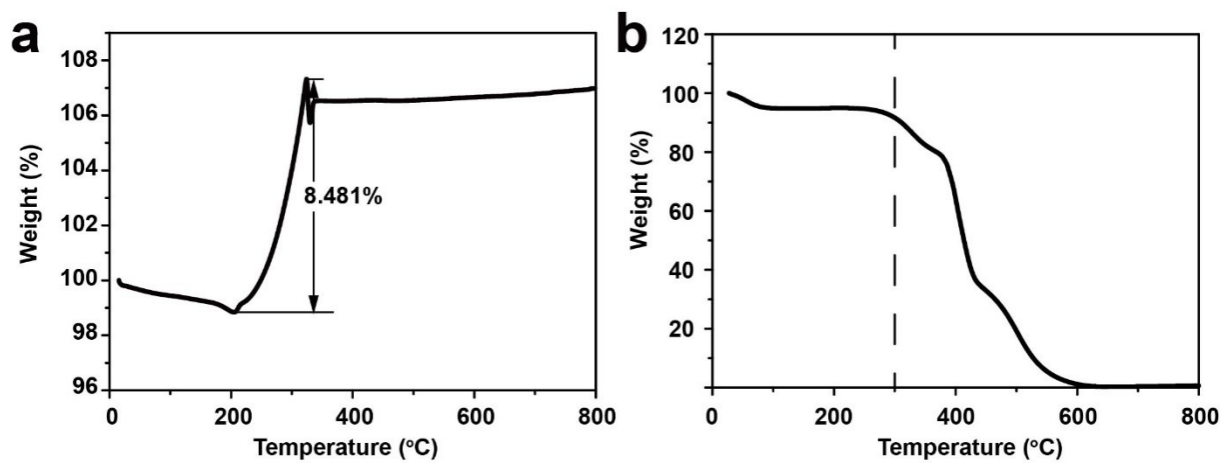

**Fig. S1** Thermogravimetric curve of (a) Cu<sub>2</sub>O nanocubes and (b) PVP.

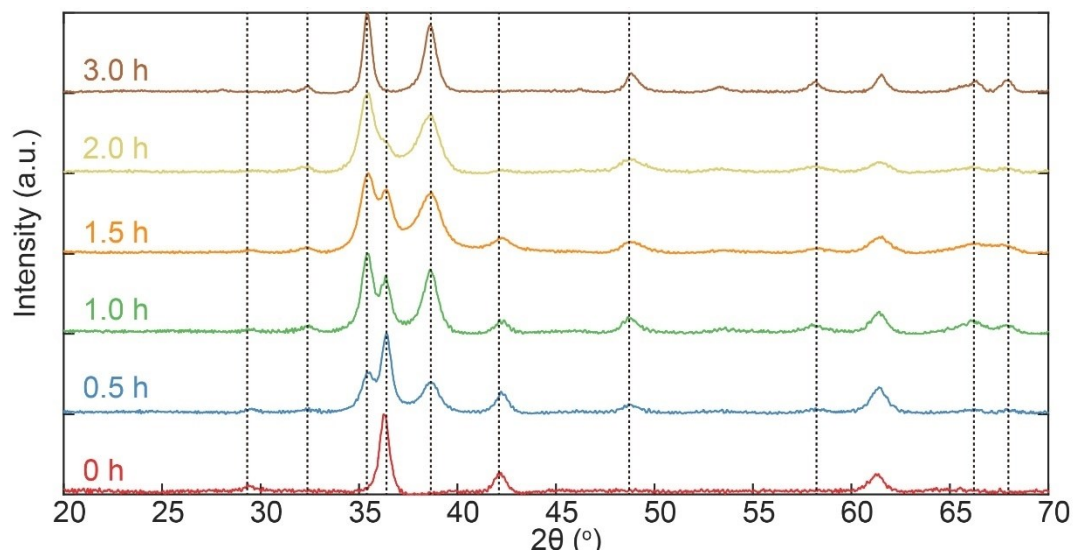

**Fig. S2** XRD spectra of Cu<sub>2</sub>O nanocubes after varying time in-air heating.

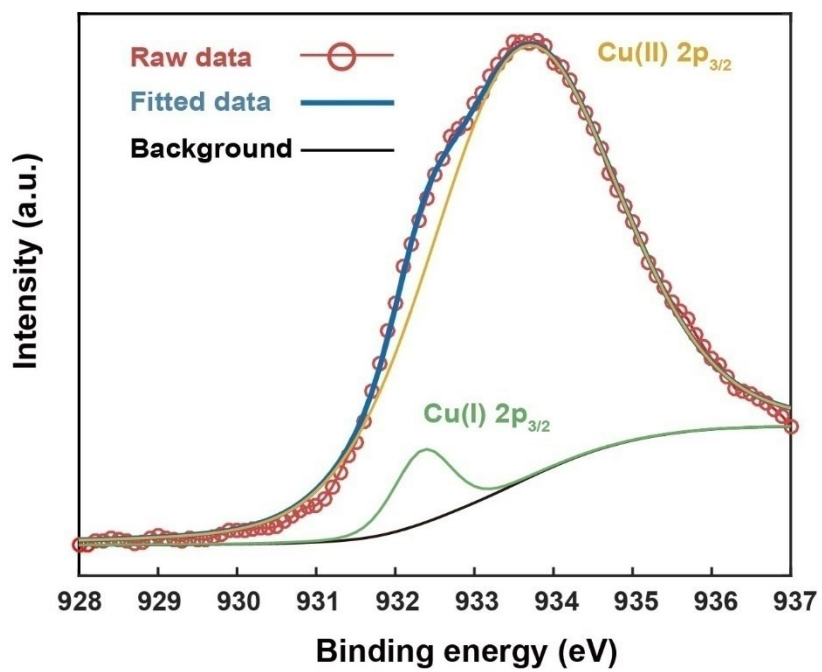

**Fig. S3** XPS peaks of Cu 2p<sub>3/2</sub> for the insufficiently transformed CuO nanocubes.

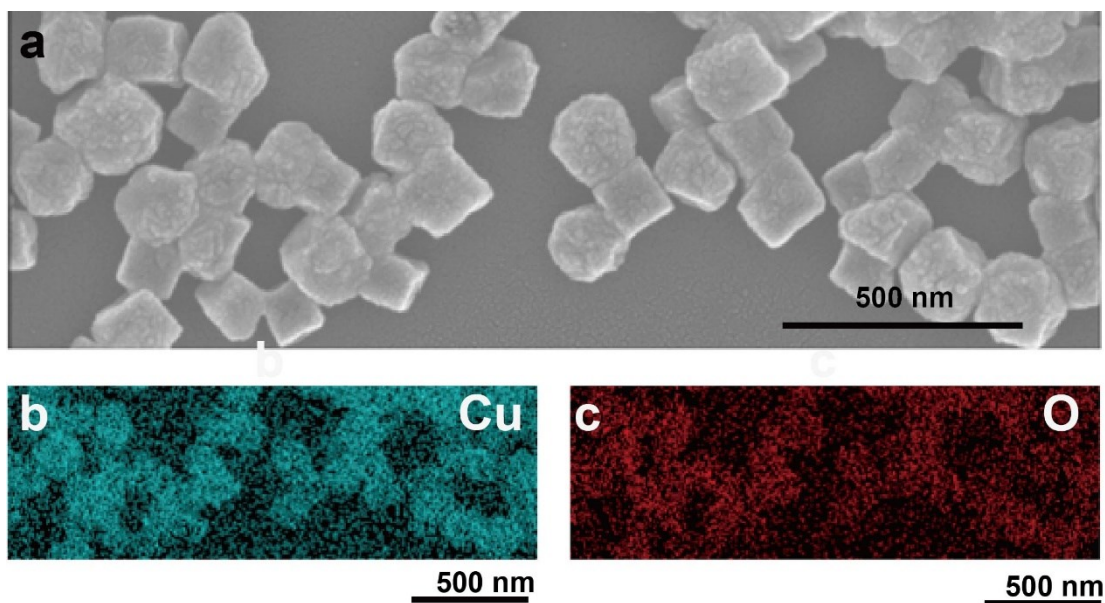

**Fig. S4** SEM image and corresponding elemental mapping analysis of CuO nanocubes.

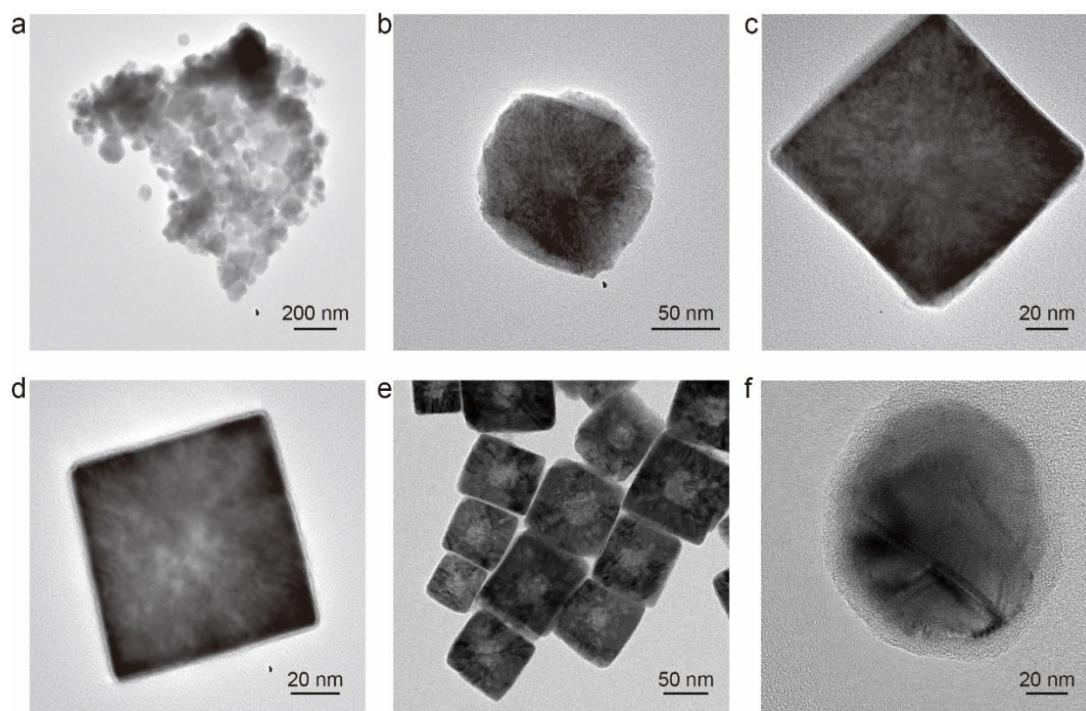

**Fig. S5** SEM images of the sample in solvothermal process with a) 3 h, b) 6 h, c) 9 h, d) 12, e) 24 h, and f) 48 h.

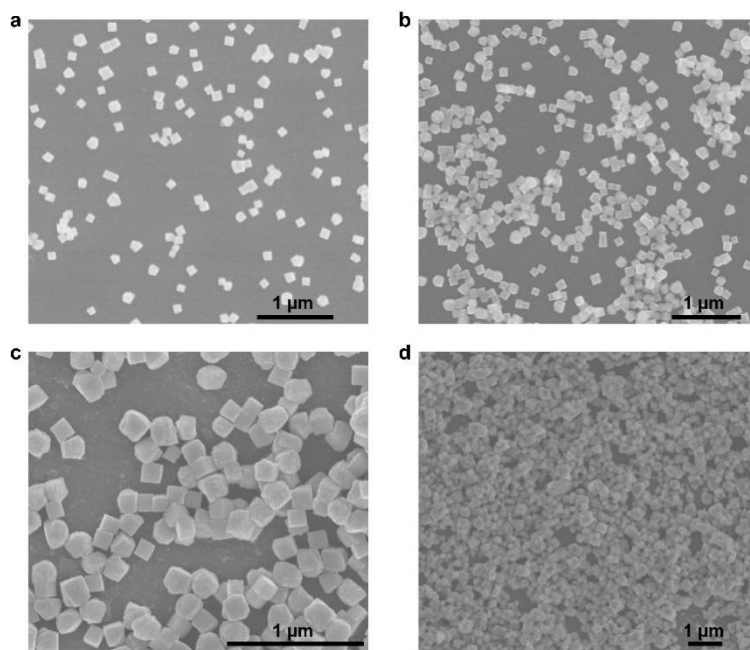

**Fig. S6** SEM images of the Cu<sub>2</sub>O nanocubes with (a)100 mg, (b), 200 mg, (c) 500 mg, and (d) 1000 mg of Cu(acac)<sub>2</sub> utilized in solvothermal reaction.

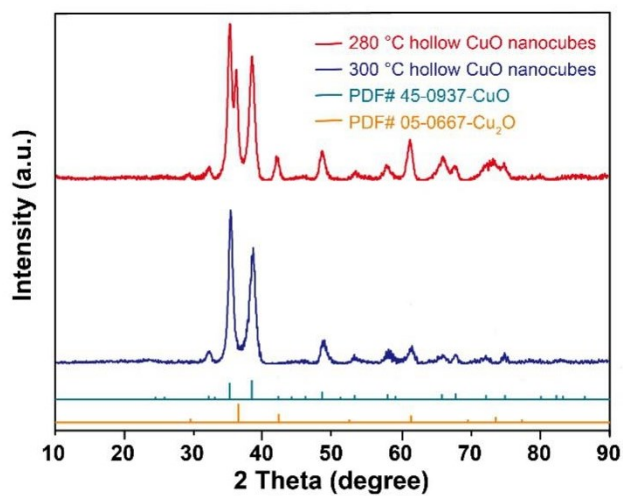

**Fig. S7** XRD of the CuO nanocubes after in-air annealing at 280 °C and 300 °C.

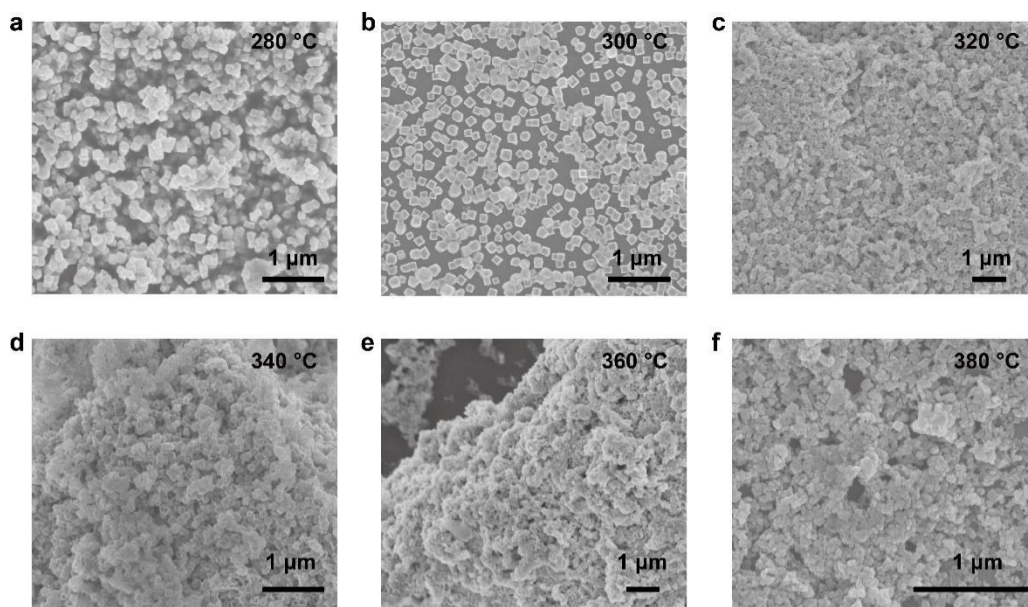

**Fig. S8** SEM images of the CuO nanocubes after in-air annealing at various temperatures. In-air annealing was conducted at (a) 280 °C, (b) 300 °C, (c) 320 °C, (d) 340 °C, (e) 360 °C and (f) 380 °C.

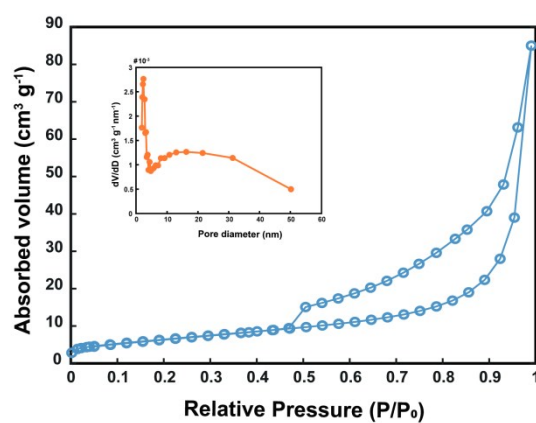

**Fig. S9** N<sub>2</sub> adsorption/desorption isotherms of CuO hollow nanocubes. Inset showed pore size distribution of CuO hollow nanocubes.

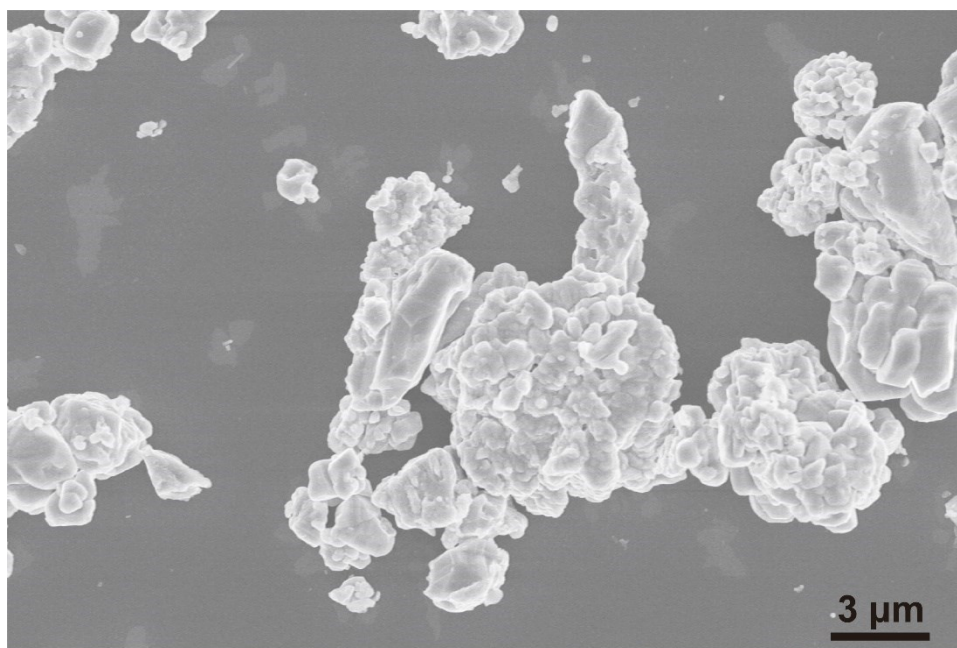

**Fig. S10** SEM image of commercialized CuO micro/nanoparticles.

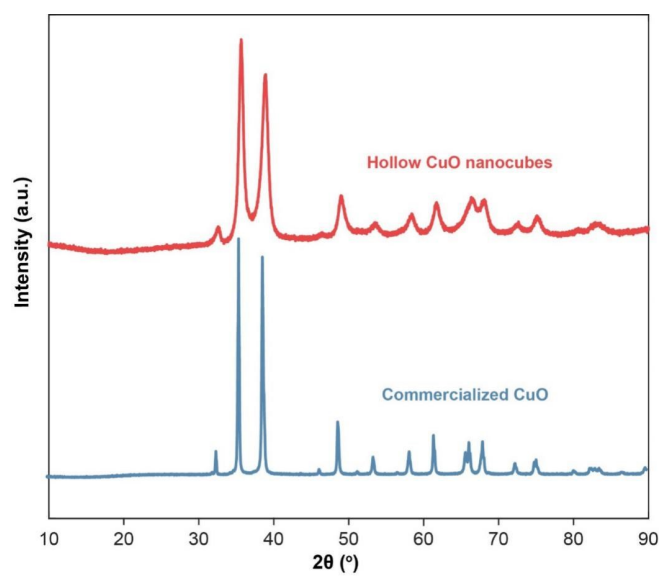

**Fig. S11** XRD spectra of hollow CuO nanocubes and commercialized CuO nanocubes.

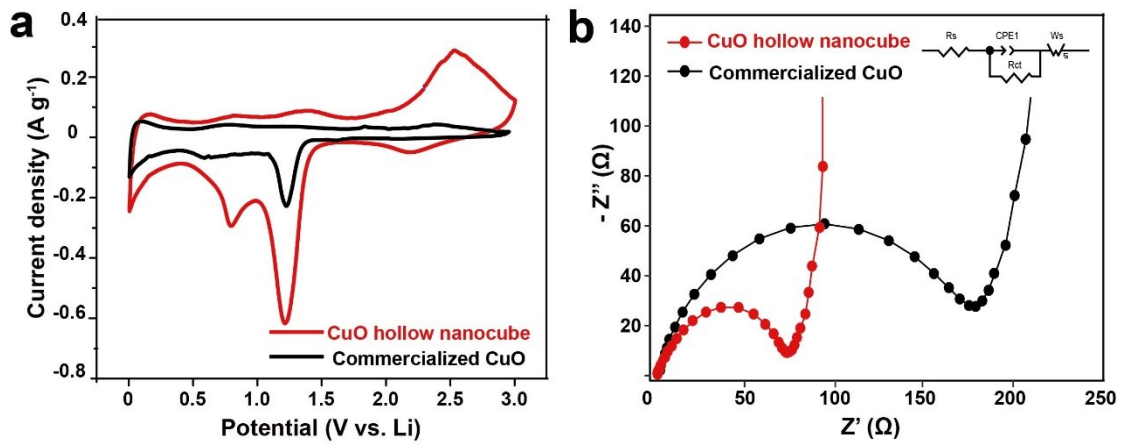

**Fig. S12** (a) Comparison of CV curves of hollow CuO nanocubes and commercialized CuO electrodes at a scan rate of 0.1 mV s<sup>-1</sup>; (b) Electrochemical impedance spectra of CuO electrodes.

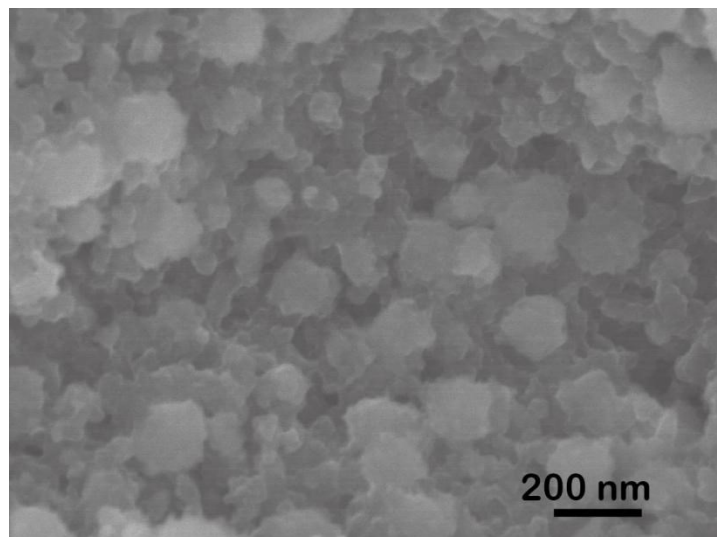

**Fig. S13** SEM image of hollow CuO nanocubes after 100 cycles.



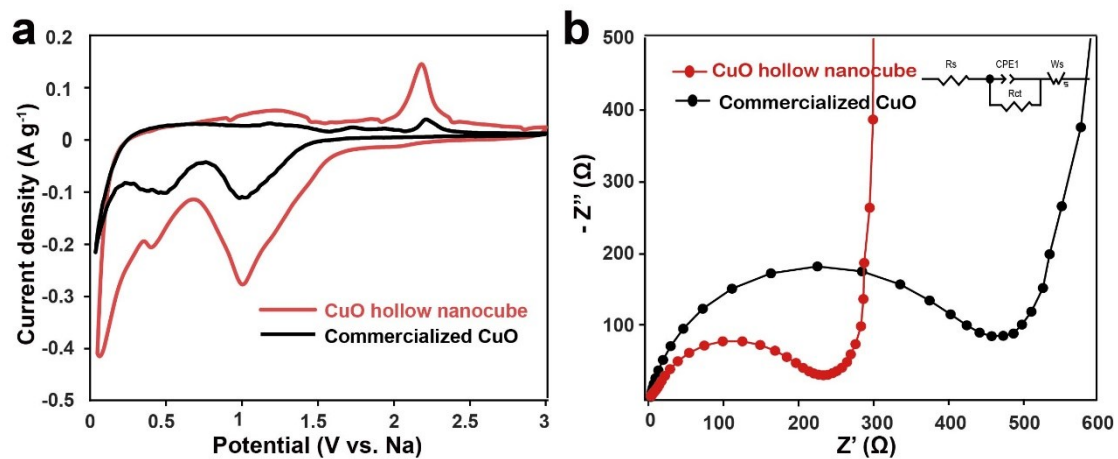

**Figure S14.** (a) Comparison of CV curves of hollow CuO nanocubes and commercialized CuO electrodes at a scan rate of  $0.1 \text{ mV s}^{-1}$ . (b) Electrochemical impedance spectra of CuO electrodes.

**Table S1. Comparison of the hollow CuO materials and other transitional oxides materials as anode for LIBs.**

| Materials                           | Theoretical capacity (mAh g <sup>-1</sup> ) | Current density (mA g <sup>-1</sup> ) | Cycle number | Specific Capacity (mAh g <sup>-1</sup> ) | Ref.      |
|-------------------------------------|---------------------------------------------|---------------------------------------|--------------|------------------------------------------|-----------|
| CuO hollow nanotubes                | 674                                         | 100                                   | 160          | 552                                      | 1         |
| CuO microspheres                    | 674                                         | 0.1 C                                 | 50           | 429.0                                    | 2         |
| CuO nanoflowers/copper              | 674                                         | 0.5 C                                 | 200          | 486.1                                    | 3         |
| peony-like CuO                      | 674                                         | 0.1 C                                 | 200          | 456                                      | 4         |
| octahedral CuO                      | 674                                         | 0.2 C                                 | 50           | 440                                      | 5         |
| MnO <sub>2</sub> hollow capsules    | 1233                                        | 50                                    | 500          | 198.4                                    | 6         |
| NiO hollow spheres                  | 718                                         | 100                                   | 45           | 490                                      | 7         |
| CeO <sub>2</sub> Hollow Nanospheres | 623                                         | 100                                   | 100          | 639                                      | 8         |
| MnO nanotubes                       | 756                                         | 200                                   | 180          | 680.7                                    | 9         |
| MnO@C nanorods                      | 756                                         | 500                                   | 100          | 186.3                                    | 10        |
| Hollow NiO nanotubes                | 718                                         | 200                                   | 100          | 620                                      | 11        |
| hollow CoO                          | 715.4                                       | 120                                   | 55           | 589.1                                    | 12        |
| Hollow CuO nanocubes                | 674                                         | 100                                   | 100          | 865                                      | This work |

**Table S2. Comparison of the hollow CuO materials and other transitional oxides materials as anodes for SIBs.**

| Materials                                       | Theoretical capacity (mAh g <sup>-1</sup> ) | Current density (mA g <sup>-1</sup> ) | Cycle number | Specific capacity (mAh g <sup>-1</sup> ) | Ref.      |
|-------------------------------------------------|---------------------------------------------|---------------------------------------|--------------|------------------------------------------|-----------|
| Flower-like carbon-coated CuO                   | 674                                         | 500                                   | 100          | 189                                      | 13        |
| N-doped carbon coated CuO array                 | 674                                         | 500                                   | 100          | 214.97                                   | 14        |
| CuO nanosheets.                                 | 674                                         | 500                                   | 40           | 218                                      | 15        |
| Nanoporous CuO/Cu composites                    | 674                                         | 500                                   | 100          | 200                                      | 16        |
| TiO <sub>2</sub> /carbon hollow spheres         | 335                                         | 500                                   | 100          | 97                                       | 17        |
| bowl-like hollow Co <sub>3</sub> O <sub>4</sub> | 890                                         | 200                                   | 10           | 290                                      | 18        |
| Hollow CuO nanocubes                            | 674                                         | 500                                   | 100          | 216                                      | This work |

## References

- 1 C. Kong, W. Lu, J. Zong, F. Pu, X. Hu, X. Zhang, Z. Yang, F. Wang and H. Jin, Template-assisted synthesis of CuO hollow nanotubes constructed by ultrathin nanosheets for lithium-ion battery applications, *J. Alloys Compd.*, 2020, **849**, 156635.
- 2 C. Wang, D. Higgins, F. Wang, D. Li, R. Liu, G. Xia, N. Li, Q. Li, H. Xu and G. Wu, Controlled synthesis of micro/nanostructured CuO anodes for lithium-ion batteries, *Nano Energy*, 2014, **9**, 334-344.
- 3 W. Yuan, Y. Ye, Y. Yang, X. Zhang, B. Pan, Z. Peng, M. Wu, Z. Qiu, C. Wang, Y. Yuan, Z. Yan and Y. Tang, CuO nanoflowers/copper fiber felt integrated porous electrode for lithium-ion batteries, *Sci. China Technol. Sci.*, 2020, **63**, 2423-2434.
- 4 R. Dang, X. Jia, P. Wang, X. Zhang, D. Wang and G. Wang, Hydrothermal synthesis of peony-like CuO micro/nanostructures for high-performance lithium-ion battery anodes, *Chinese Chem. Lett.*, 2017, **28**, 2263-2268.
- 5 L. Feng, Z. Xuan, Y. Bai, H. Zhao, L. Li, Y. Chen, X. Yang, C. Su, J. Guo and X. Chen, Preparation of octahedral CuO micro/nanocrystals and electrochemical performance as anode for lithium-ion battery, *J. Alloys Compd.*, 2014, **600**, 162-167.
- 6 Y. Wang, P.-S. Ding, M.-G. Zou, W.-B. Guo, D.-X. Wang and F.-C. Zhang, Synthesis of nanosheet-based MnO<sub>2</sub> hollow capsules and their application in lithium batteries, *Ferroelectrics*, 2018, **522**, 75-79.
- 7 X. H. Huang, J. P. Tu, C. Q. Zhang and F. Zhou, Hollow microspheres of NiO as anode materials for lithium-ion batteries, *Electrochim. Acta*, 2010, **55**, 8981-8985.
- 8 M. Sasidharan, N. Gunawardhana, M. Yoshio and K. Nakashima, CeO<sub>2</sub> Hollow Nanospheres as Anode Material for Lithium Ion Batteries, *Chem. Lett.*, 2012, **41**, 386-388.
- 9 S. Zhang, W. He, X. Zhang and X. Yang, Rational design of carbon-coated hollow MnO nanotubes for Li-ion batteries, *J. Mater. Sci. Mater. Electron.*, 2015, **26**, 2189-2197.
- 10 X. Zhang, G. Zhu, D. Yan, T. Lu and L. Pan, MnO@C nanorods derived from metal-organic frameworks as anode for superiorly stable and long-life sodium-ion batteries, *J. Alloys Compd.*, 2017, **710**, 575-580.
- 11 L. Liu, Y. Guo, Y. Wang, X. Yang, S. Wang and H. Guo, Hollow NiO nanotubes synthesized by biotemplates as the high performance anode materials of lithium-ion batteries, *Electrochim. Acta*, 2013, **114**, 42-47.

- 12 Y. Li, Q. Guan, J. Cheng, W. Ni and B. Wang, Carbon-coated hollow CoO microporous nanospheres synthesized by CoF<sub>2</sub> as the intermediates as anode materials for lithium-ion batteries, *Ionics*, 2018, **24**, 1587-1594.
- 13 S. Xu, L. Lu, Q. Zhang, Q. Jiang, Z. Luo, S. Wang, G. Li and C. Feng, A Facile Synthesis of Flower-Like CuO as Anode Materials for Lithium (Sodium) Ion Battery Applications, *J. Nanosci. Nanotechnol.*, 2016, **16**, 7655-7661.
- 14 Y. Li, M. Zhang, J. Qian, Y. Ma, Y. Li, W. Li, F. Wang, L. Li, F. Wu and R. Chen, Freestanding N - Doped Carbon Coated CuO Array Anode for Lithium - Ion and Sodium - Ion Batteries, *Energy Technol.*, 2019, **7**.
- 15 Y. Liu, Y. Qiao, W. Zhang, P. Hu, C. Chen, Z. Li, L. Yuan, X. Hu and Y. Huang, Facile fabrication of CuO nanosheets on Cu substrate as anode materials for electrochemical energy storage, *J. Alloys Compd.*, 2014, **586**, 208-215.
- 16 T. Zheng, G. Li, D. Li and X. Meng, Based on Cu as framework constructed nanoporous CuO/Cu composites by a dealloy method for sodium-ion battery anode, *J. Nanopart Res.*, 2018, **20**.
- 17 F. Yang, Z. Zhang, Y. Han, K. Du, Y. Lai and J. Li, TiO<sub>2</sub> /carbon hollow spheres as anode materials for advanced sodium ion batteries, *Electrochim. Acta*, 2015, **178**, 871-876.
- 18 J.-W. Wen, D.-W. Zhang, Y. Zang, X. Sun, B. Cheng, C.-X. Ding, Y. Yu and C.-H. Chen, Li and Na storage behavior of bowl-like hollow Co<sub>3</sub>O<sub>4</sub> microspheres as an anode material for lithium-ion and sodium-ion batteries, *Electrochim. Acta*, 2014, **132**, 193-199.
